# Supplementary material for: Adsorption and oxidation of SO2 on the surface of TiO2 nanoparticles: the role of terminal hydroxyl and oxygen vacancy–Ti3+ states
Source: Royal Society of Chemistry journal article supplement (doi:10.1039/d0cp00785d), 2020-01-01
Supplement: d0cp00785d1.pdf [file d0cp00785d1.pdf]

1                                    **Electronic supplementary information**

2            **Adsorption and Oxidation of SO<sub>2</sub> on the Surface of TiO<sub>2</sub> Nanoparticles: The**  
3                                    **Role of Terminal hydroxyl, Oxygen Vacancy-Ti<sup>3+</sup> States**

4

5 Bing Wang,<sup>a</sup> Xue Li,<sup>a,b</sup> Shanshan Liang,<sup>a,c</sup> Runxuan Chu,<sup>a,c</sup> Dan Zhang,<sup>a,b</sup> Hanqing  
6 Chen,<sup>a</sup> Meng Wang,<sup>a</sup> Shuang Zhou,<sup>a,b</sup> Wei Chen,<sup>a,b</sup> Xingzhong Cao<sup>d</sup> and Weiyue  
7 Feng<sup>\*,a</sup>

8 <sup>a</sup>CAS Key Laboratory for Biomedical Effects of Nanomaterials and Nanosafety,  
9 Institute of High Energy Physics, Chinese Academy of Sciences, Beijing 100049,  
10 China

11 <sup>b</sup>University of Chinese Academy of Sciences, Beijing 100049, China

12 <sup>c</sup>Institute of Health Sciences, Anhui University, Hefei, Anhui 230601, China

13 <sup>d</sup>Muti-disciplinary Research Division, Institute of High Energy Physics, Chinese  
14 Academy of Sciences, Beijing 100049, China

15 \*Corresponding author: *E-mail address*: fengwy@ihep.ac.cn

16

## 17 **Experimental Section**

### 18 **Chamber experiment**

19       The TiO<sub>2</sub>NPs was flattened in a quartz tube in the box. The gas flow rate of SO<sub>2</sub>  
20 and O<sub>3</sub> was controlled by mass flow meters. O<sub>3</sub> was generated by O<sub>3</sub> generator and the  
21 concentration was monitored by O<sub>3</sub> sensor. The concentrations of SO<sub>2</sub> were controlled  
22 at 0.1 ppm (280 μg/m<sup>3</sup>), 0.5 ppm (1400 μg/m<sup>3</sup>) and 2 ppm (5600 μg/m<sup>3</sup>). The  
23 chamber RH was controlled *via* introducing humidified N<sub>2</sub> gas that flowed through a  
24 tank filled with deionized water. The kinetics of SO<sub>2</sub> oxidation on TiO<sub>2</sub>NPs at  
25 different time points (10, 20, 30, 120 and 240 min) were studied. All the experiments  
26 were operated under ambient pressure at room temperature.

27

28 Table S1. Positron annihilation lifetimes and intensities of TiO<sub>2</sub>NPs analyzed by LT-9 program

| Samples              | $\tau_1$ (ps) | $I_1$ (%)  | $\tau_2$ (ps) | $I_2$ (%)  | $\tau_3$ (ns) | $I_3$ (%)   |
|----------------------|---------------|------------|---------------|------------|---------------|-------------|
| TiO <sub>2</sub> NPs | 214 ± 2       | 59.5 ± 1.3 | 393 ± 7       | 38.7 ± 1.3 | 2.34 ± 0.06   | 1.79 ± 0.07 |

29

30

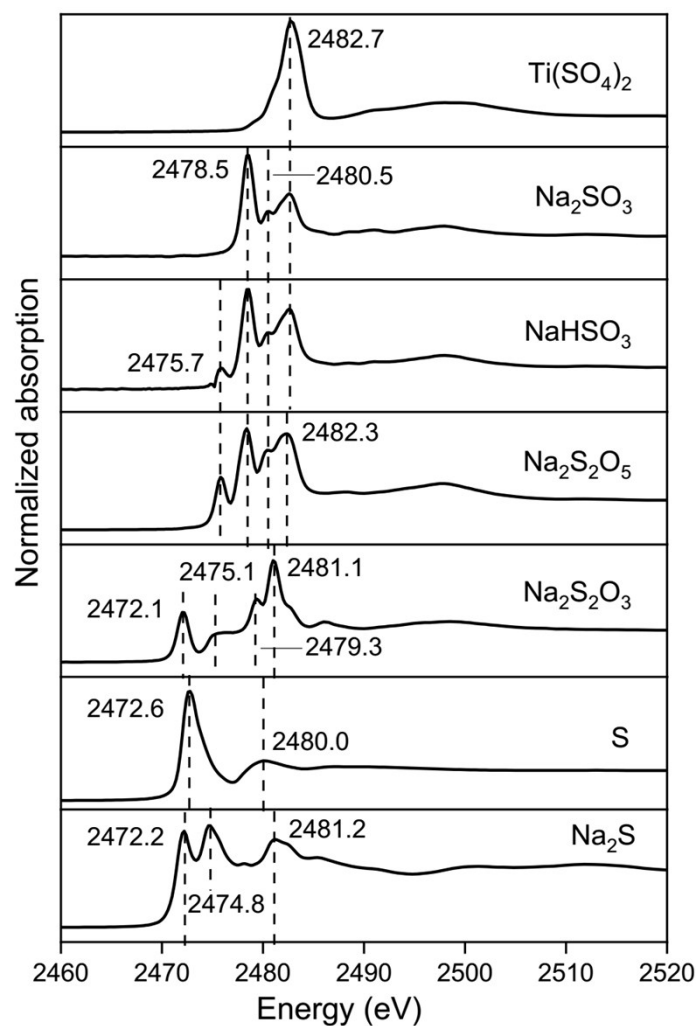

31

32

33 Fig. S1. Sulfur K-edge XANES spectra of S-containing standard references, including  
 34 titanium sulfate [Ti(SO<sub>4</sub>)<sub>2</sub>], sodium sulfite (Na<sub>2</sub>SO<sub>3</sub>), sodium bisulfite (NaHSO<sub>3</sub>),  
 35 sodium metabisulfite (Na<sub>2</sub>S<sub>2</sub>O<sub>5</sub>), sodium thiosulfate (Na<sub>2</sub>S<sub>2</sub>O<sub>3</sub>), elemental sulfur (S)  
 36 and sodium sulfide (Na<sub>2</sub>S).

37

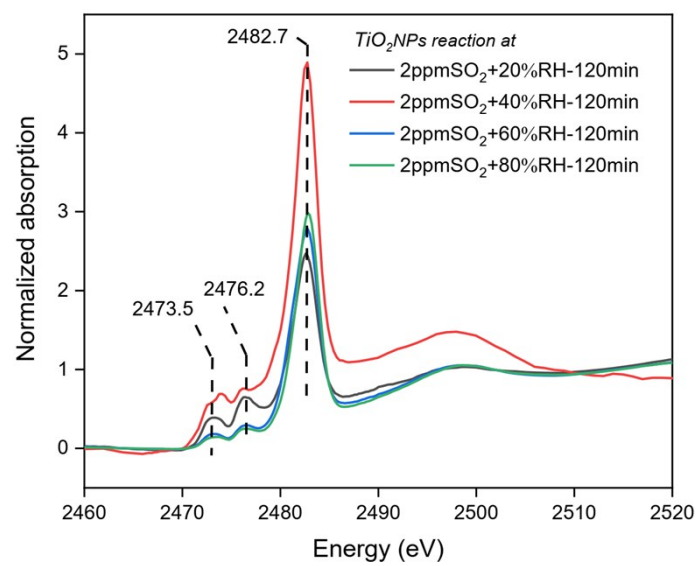

38

39 Fig. S2. Sulfur K-edge XANES measurement for the effects of relative humidity (RH)  
40 on SO<sub>2</sub> oxidation in TiO<sub>2</sub>NPs after 2-ppm SO<sub>2</sub> reaction with TiO<sub>2</sub>NPs for 120 min.

41

42

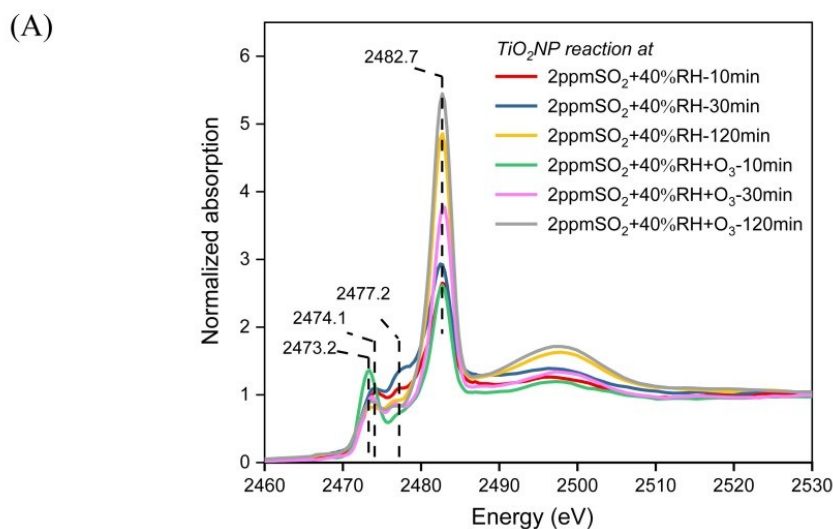

(B) Quantitative analysis of sulfur chemical species on  $\text{TiO}_2\text{NPs}$  when  $\text{O}_3$  co-presence

| $\text{TiO}_2\text{NP}$ reaction at             | Sulfite/Bisulfite | Sulfate |
|-------------------------------------------------|-------------------|---------|
| 2ppm $\text{SO}_2$ +40%RH-10min                 | 11.5              | 88.5    |
| 2ppm $\text{SO}_2$ +40%RH-30min                 | 8.3               | 91.7    |
| 2ppm $\text{SO}_2$ +40%RH-120min                | 3.4               | 96.6    |
| 2ppm $\text{SO}_2$ +40%RH+ $\text{O}_3$ -10min  | 9.9               | 90.1    |
| 2ppm $\text{SO}_2$ +40%RH+ $\text{O}_3$ -30min  | 7.3               | 98.8    |
| 2ppm $\text{SO}_2$ +40%RH+ $\text{O}_3$ -120min | 2.4               | 99.4    |

43

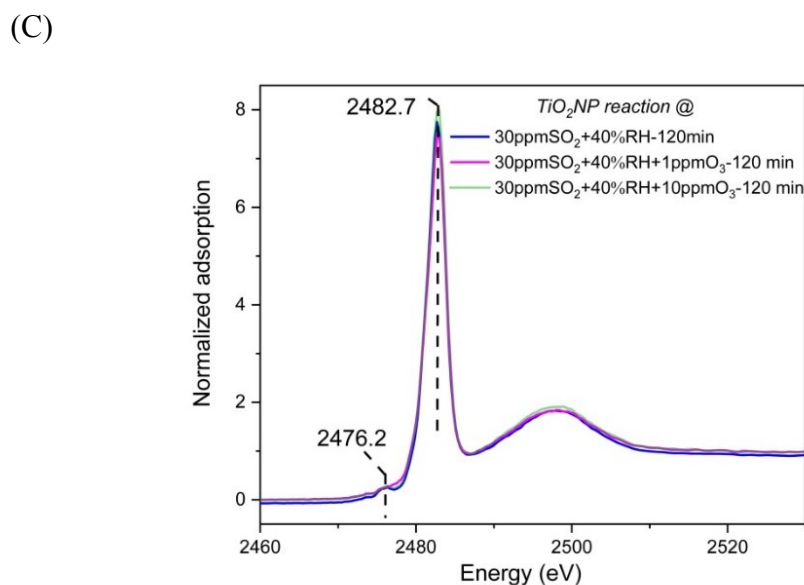

44

45

46 Fig. S3. Sulfur K-edge XANES measurement for  $\text{SO}_2$  oxidation on  $\text{TiO}_2\text{NPs}$  (at 40%  
47 RH) when 1 ppm and 10 ppm  $\text{O}_3$  copresence.

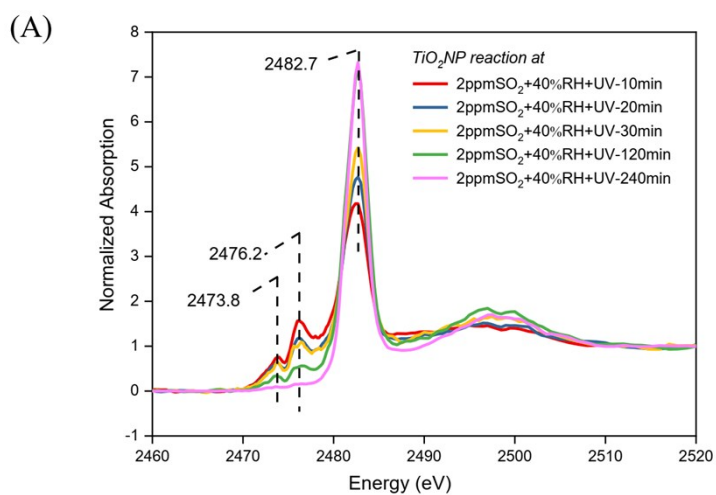

(B) Quantitative analysis of S chemical species on TiO<sub>2</sub>NPs

| Reaction time | Sulfite/Bisulfite | Sulfate |
|---------------|-------------------|---------|
| 10min         | 6.9               | 93.1    |
| 20min         | 4.4               | 95.6    |
| 30 min        | 2.8               | 97.2    |
| 120 min       | 1.1               | 98.9    |
| 240 min       | 0.1               | 99.9    |

49

50 Fig. S4. Sulfur K-edge XANES measurement for the effects of UV-irradiation time on  
 51 SO<sub>2</sub> oxidation in TiO<sub>2</sub>NPs after reactions (at 40% RH).

52

53

54
